# Supplementary material
Source: HighWire-hosted journal article supplement (https://www.g3journal.org/content/suppl/2016/08/08/g3.116.032482)
Supplement: TableS2.pdf [file TableS2.pdf]

**Table S2. Sequences of primers used in this study.**

| <b>Primer name</b> | <b>Sequence 5'-3'</b>                                                                       |
|--------------------|---------------------------------------------------------------------------------------------|
| Q-AA2-sp_Fw        | GGGCTAACTACTGGACCCCA                                                                        |
| Q-AA2-sp_Rv        | GTGTAACCATACCCAAGGTTGCT                                                                     |
| Q-AA2-no-sp_Fw     | TTTCGATTCAGATCGCTGGCAA                                                                      |
| Q-AA2-no-sp_Rv     | GTGTAACCATACCCAAGGTTGCT                                                                     |
| Q-Sso3194_Z_Fw     | ATCAGTGGAGACGAGTGGCAAGA                                                                     |
| Q-Sso3194_Z_Rv     | ATTGCAGCCTTAACCTCGCCTTCT                                                                    |
| CR6-Fw             | TTATCGGAGGCATATAATAGTTCCA                                                                   |
| CR6-Rv             | AATCCAATGAGCCGGGACAAGTTTCACAA                                                               |
| M_Fw               | TGCAGAATTATCGCCCAGAACAA                                                                     |
| M_Rv               | GTTAGTTCACCCACCGACAAATACA                                                                   |
| MOE_Fw             | AGAATTATCGCCCAGAACAAATTTCTGATAATCTCTTATAGAATTGAA<br>G                                       |
| MOE_Rv             | GTTAGTTCACCCACCGACAAATACAATTTCAATTCTATAAGAGATTAT<br>C                                       |
| AA5_Fw             | gttgcgctgaaattctgccattccattGATAATCTCTTATAGAATTGA                                            |
| AA5_Rv             | tgggcagaatttcagcgcaaccatagggcCTTTCAATTCTATAAGAGATT                                          |
| AA5_Fw             | aacatcttgattgcaagtttgaccagGATAATCTCTTATAGAATTGA                                             |
| AA5_Rv             | aactcgcaataacaagatgtttattcattCTTTCAATTCTATAAGAGATT                                          |
| AA5_Fw             | ttctccccatctaaagcaactgtaacaacGATAATCTCTTATAGAATTGA                                          |
| AA5_Rv             | agttgcttagatggggagaatcctctaCTTTCAATTCTATAAGAGATT                                            |
| AA4_Fw             | tcatcagttatattaccccatggaatccGATAATCTCTTATAGAATTGA                                           |
| AA4_Rv             | atggggtaataataactgatgaattgatgaCTTTCAATTCTATAAGAGATT                                         |
| AA5_Fw             | actaatggtgaaatgtggctccaacagcGATAATCTCTTATAGAATTGA                                           |
| AA5_Rv             | AGCCAACATTTACCATTAGTCTATCTACCTTTCAATTCTATAAGAGAT<br>T                                       |
| MA2-over_Fw        | TACAAGATGTTTATTCATTCTTTCAATTCTATAAGAGATTATCCTGGTC<br>AAAACCTTCGCAATACAAGATGTTTATTCATTCTTTCA |
| MA2-over_Rv        | ATTGCGAAGTTTTGACCAGGATAATCTCTTATAGAATTGAAAGAATGA<br>ATAAACATCTTGATTGCGAAGTTTTGACCAG         |
| MA2-lin_Fw         | ACAAGATGTTTATTCATTCTTTCA                                                                    |
| MA2-lin_Rv         | ATTGCGAAGTTTTGACCAG                                                                         |
